# Supplementary material for: High-efficiency and safe sulfur-doped iron oxides for magnetic resonance imaging-guided photothermal/magnetic hyperthermia therapy
Source: Royal Society of Chemistry journal article supplement (doi:10.1039/d0dt00297f), 2020-01-01
Supplement: d0dt00297f1.pdf [file d0dt00297f1.pdf]

## Electronic Supplementary Information

### High-efficiency and Safe Sulfur-Doped Iron Oxides for Magnetic Resonance Imaging Guided Photothermal/Magnetic Hyperthermia Therapy

Guoqiang Guan,<sup>‡a</sup> Bo Li,<sup>‡c</sup> Wenlong Zhang,<sup>a</sup> Zhe Cui,<sup>a</sup> Shu-Ang He,<sup>a</sup> Rujia Zou,<sup>\*a</sup>

Xinwu Lu<sup>c</sup> and Junqing Hu<sup>\*a,b</sup>

<sup>a</sup> State Key Laboratory for Modification of Chemical Fibers and Polymer Materials, College of Materials Science and Engineering, Donghua University, Shanghai 201620, China.

<sup>b</sup> College of Health Science and Environmental Engineering, Shenzhen Technology University, Shenzhen 518118, China.

<sup>c</sup> Department of Vascular Surgery, Shanghai Ninth People's Hospital, Shanghai JiaoTong University School of Medicine, Shanghai 200011, China

\* Corresponding Author.

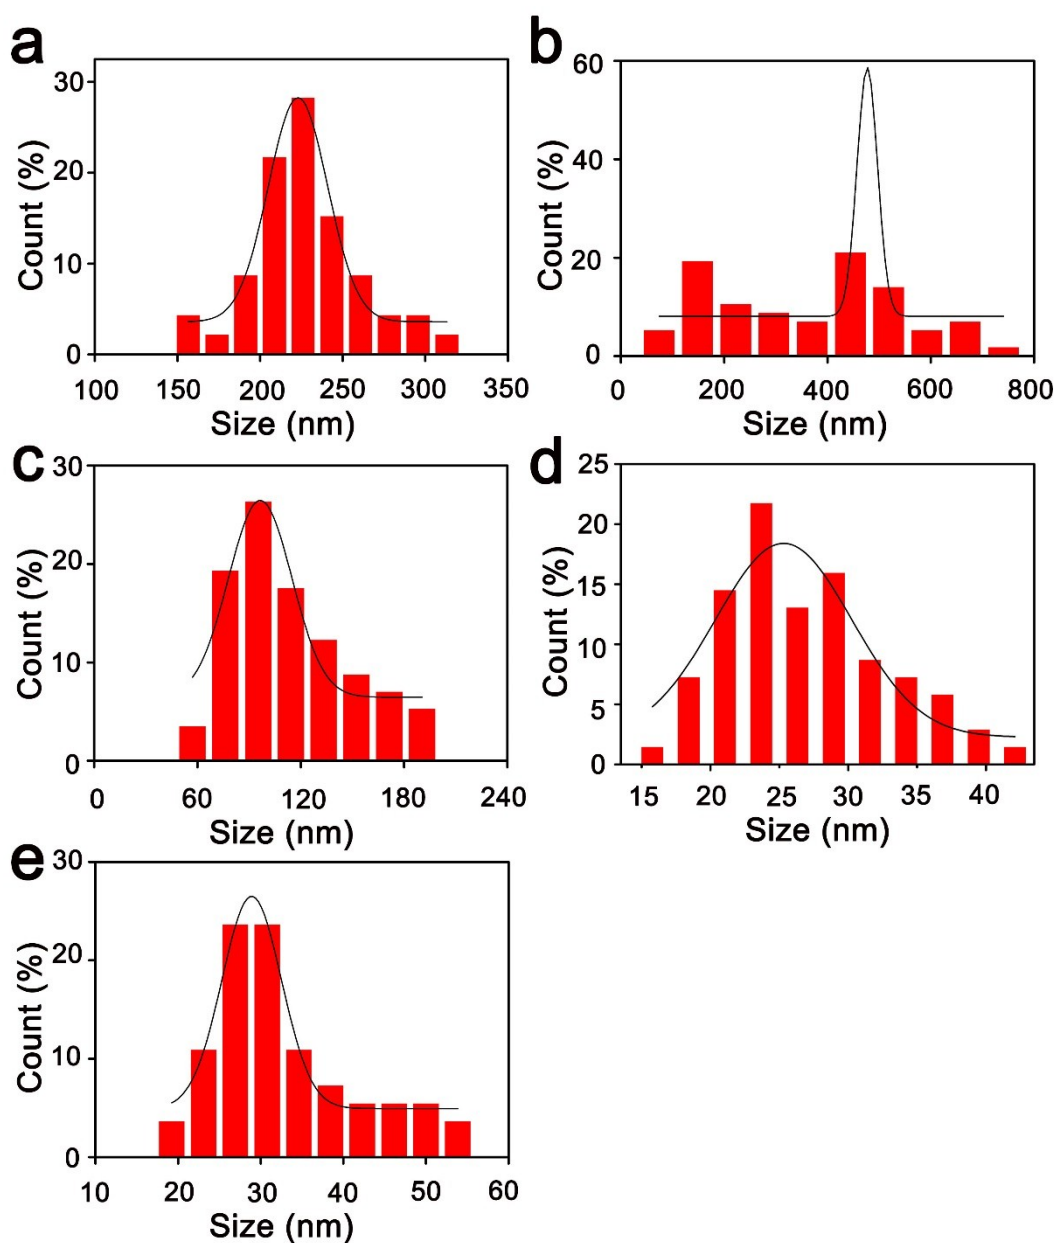

**Fig. S1** Size distribution histogram of over 100 randomly selected nanoparticles from the corresponding TEM images. (a) The long edge length of SDIO-0 is  $223.0 \pm 35.9$  nm. (b) The long edge length of SDIO-25 is  $477.3 \pm 39.8$  nm. (c) The mean size of SDIO-50 is  $96.4 \pm 36.7$  nm. (d) The mean size of SDIO-100 is  $25.3 \pm 9.8$  nm. (e) The edge length of SDIO-200 is  $28.9 \pm 7.1$  nm. Data is presented as the mean  $\pm$  s.e.m.

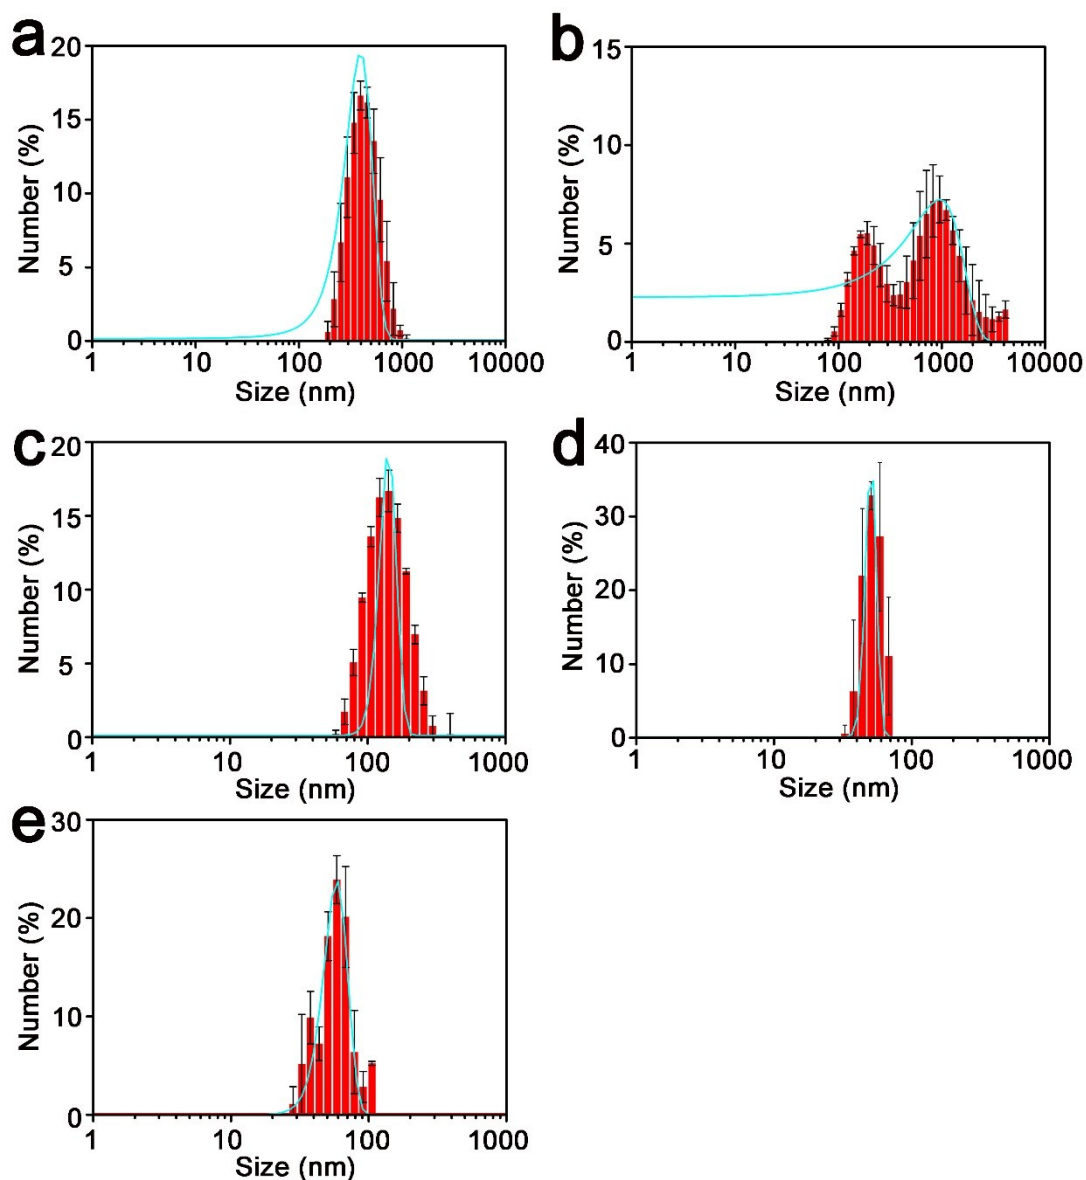

**Fig. S2** DLS of the SDIOs in PBS solution for three times. (a) The hydrodynamic diameter (HD) of SDIO-0 is  $396.1 \pm 240.4$  nm. (b) The hydrodynamic diameter of SDIO-25 is  $955.4 \pm 628.7$  nm. (c) The hydrodynamic diameter of SDIO-50 is  $141.8 \pm 39.6$  nm. (d) The hydrodynamic diameter of SDIO-100 is  $50.7 \pm 9.1$  nm. (e) The hydrodynamic diameter of SDIO-200 is  $58.7 \pm 11.6$  nm. Data is presented as the mean  $\pm$  s.e.m.

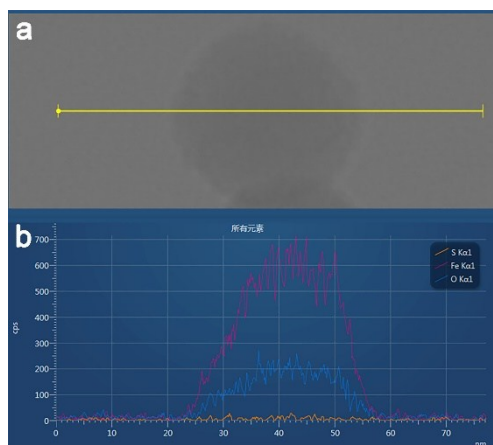

**Fig. S3** The corresponding EDX line scan profiles of SDIO-100 nanoparticle, indicating small amount of S doping in the iron oxide crystal.

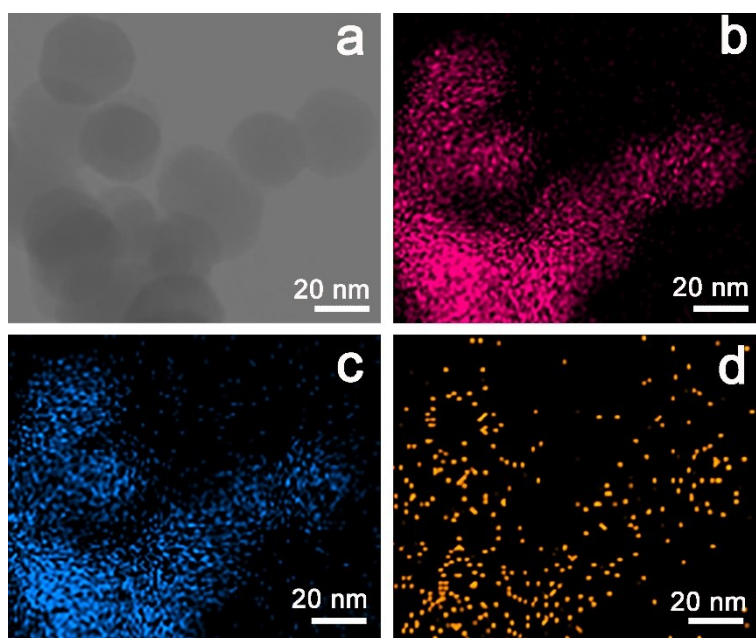

**Fig. S4** STEM-EDS elemental maps of the nanocrystals. (a) STEM image, elemental mapping (Fe: (b), O: (c), S: (d)) of the sample.

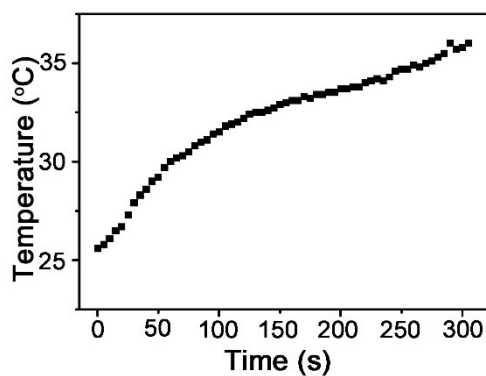

**Fig. S5** Heating curves of the IO-100 aqueous dispersion in an alternating magnetic

field for 300 s.

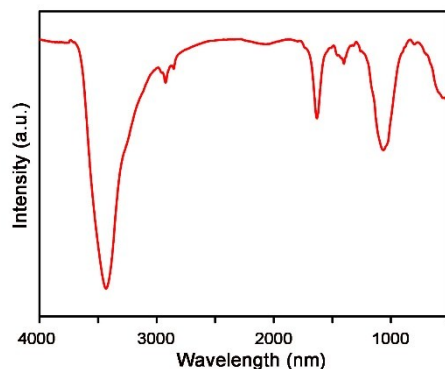

**Fig. S6** FTIR spectrum of the SDIO-100. The bands at 2850-2950  $\text{cm}^{-1}$  are due to the C-H stretching vibration from the PVP and the band around 1400  $\text{cm}^{-1}$  is assigned to the C-H deformation vibration in the PVP.

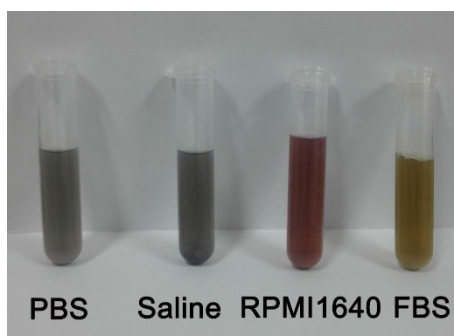

**Fig. S7** A camera image of the SDIO-100 dispersed in PBS, Saline, RPMI1640, FBS for over one day.

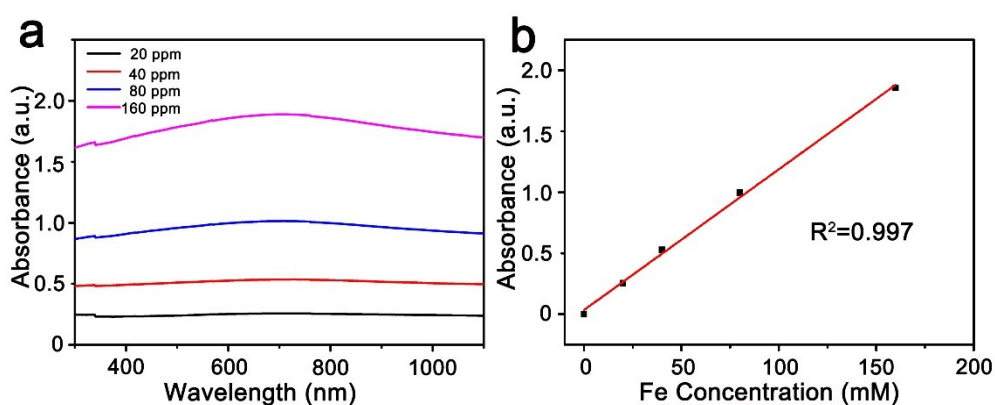

**Fig. S8** (a) UV-Vis-NIR spectra of the SDIO-100 aqueous solution at different Fe concentrations. (b) The corresponding linear relationship between the absorbance at 808 nm and the concentration.

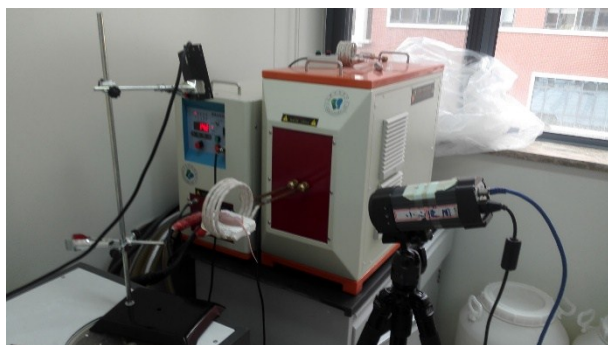

**Fig. S9** The camera image shows the in vivo synergistic treatment combination between PTT and MH.

**Table S1.** The detailed peak positions for the fitted Fe peaks.

| Samples  | Fe <sup>2+</sup> 2p <sub>3/2</sub> | Fe <sup>2+</sup> 2p <sub>1/2</sub> | Fe <sup>3+</sup> 2p <sub>3/2</sub> | Fe <sup>3+</sup> 2p <sub>1/2</sub> |
|----------|------------------------------------|------------------------------------|------------------------------------|------------------------------------|
| SDIO-0   | 710.1                              | 723.7                              | 712.0                              | 725.5                              |
| SDIO-25  | 710.4                              | 723.9                              | 712.6                              | 725.7                              |
| SDIO-50  | 710.2                              | 723.8                              | 712.2                              | 726.0                              |
| SDIO-100 | 709.9                              | 723.1                              | 712.6                              | 725.5                              |
| SDIO-200 | 709.9                              | 722.9                              | 712.9                              | 725.1                              |

**Table S2.** The detailed peak positions for the fitted O peaks.

| Samples | Fe-O  | chemisorbed O | S-O   |
|---------|-------|---------------|-------|
| Fe-0    | 529.4 | 530.9         | 532.2 |
| Fe-25   | 529.2 | 530.3         | 532.7 |
| Fe-50   | 529.2 | 530.7         | 532.0 |
| Fe-100  | 529.0 | 530.7         | 532.3 |
| Fe-200  | 529.1 | 530.3         | 531.6 |

**Table S3.** The detail peak positions for the fitted S peaks.

| Samples | S <sup>2-</sup><br>2p <sub>3/2</sub> | S <sup>2-</sup><br>2p <sub>1/2</sub> | S=C   | FeIII-S | Fe <sub>x</sub> O <sub>y</sub> S <sub>z</sub> | Fe <sub>x</sub> O <sub>y</sub> S <sub>z</sub> |
|---------|--------------------------------------|--------------------------------------|-------|---------|-----------------------------------------------|-----------------------------------------------|
| Fe-0    | 161.8                                | 162.3                                | 163.2 | 165.3   | 168.0                                         | 169.4                                         |
| Fe-25   | 161.8                                | 162.2                                | 163.0 | 165.4   | 168.0                                         | 169.3                                         |
| Fe-50   | 161.7                                | 162.5                                | 163.4 | 165.2   | 167.8                                         | 168.5                                         |

|        |       |       |       |       |       |       |
|--------|-------|-------|-------|-------|-------|-------|
| Fe-100 | 161.2 | 162.3 | 163.1 | 164.9 | 167.9 | 168.8 |
| Fe-200 | 161.8 | 162.8 | 163.4 | 165.0 | 167.0 | 168.5 |

**Table S4.** Determination of the mass ratio of S to Fe in the SDIO samples which the ethylenediamine with different volumes was added.

|            |         |         |         |          |          |
|------------|---------|---------|---------|----------|----------|
|            | SDIO-0  | SDIO-25 | SDIO-50 | SDIO-100 | SDIO-200 |
| S/Fe (ICP) | 16.89 % | 7.14 %  | 1.04 %  | 0.87 %   | 1.69 %   |

**Table S5.** The specific absorption rate (SAR) values of SDIOs and IO-100.

|                          |        |         |         |          |          |        |
|--------------------------|--------|---------|---------|----------|----------|--------|
| Sample                   | SDIO-0 | SDIO-25 | SDIO-50 | SDIO-100 | SDIO-200 | IO-100 |
| SAR (W g <sup>-1</sup> ) | 334.8  | 368.3   | 493.8   | 1235.4   | 664.5    | 1004.4 |
